# Supplementary material for: Optical Genome Mapping for Comprehensive Assessment of Chromosomal Aberrations and Discovery of New Fusion Genes in Pediatric B-Acute Lymphoblastic Leukemia
Source: MDPI journal article supplement (doi:10.3390/cancers15010035), 2022-12-21

A

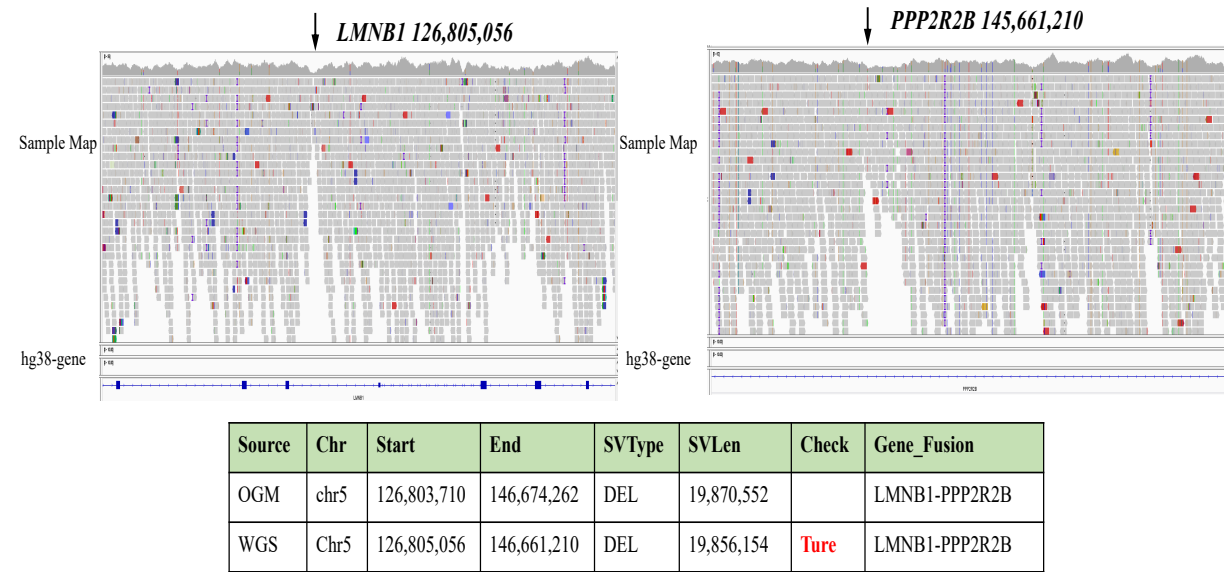

C

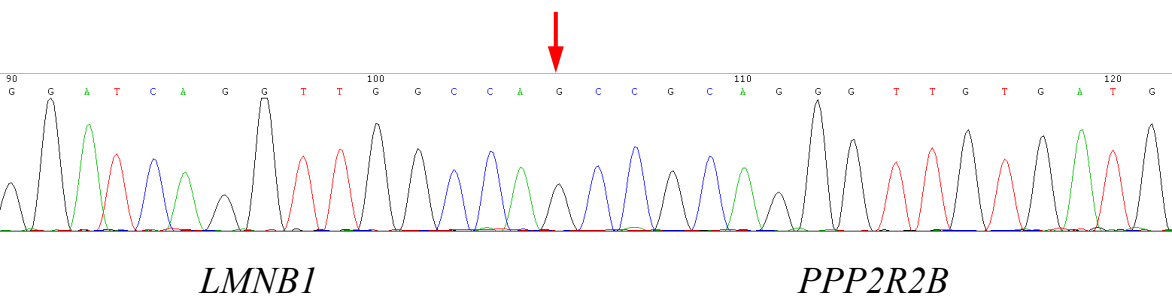

B

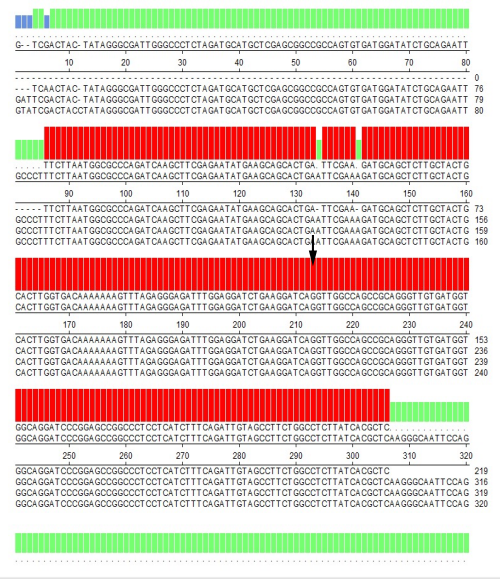

AGCTGCTCCTCAAGCTATGCTAAGAAGGAATCTGAT**TCTTAA**  
**TGGCGCCCAGATCA**AGCTTCGAAATATGAAGCAGCACTG  
AATTCGAAAAGATGCAGCTCTTTGCTACTGCACTTGGTGACA  
AAAAAAGTTTAGAGGGAGATTTGGAGGATCTGAAGGATCA  
GGTTGGCCA**█**CCGAGGGTTGTGATGGTGGCAGGATCCCG  
GAGCCGCCCCTCCTCATCTTTCAGATTGTAGCCT**TCTGGCC**  
**TCTTATCACGCTC**CGCTGACTTTCCACAGCTTCACAGTTTAT  
CATTAGTAGACAGAAGAAAGTAAGCTGCATTCTGCTGGG  
(Product size 220bp)

D

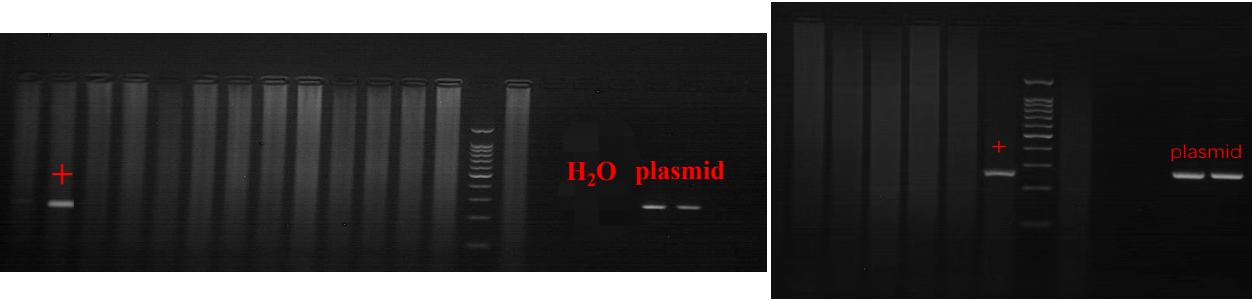

Supplement: s1 [file s1]
