# Supplementary figures and images for: Optical Genome Mapping for Comprehensive Assessment of Chromosomal Aberrations and Discovery of New Fusion Genes in Pediatric B-Acute Lymphoblastic Leukemia
Source: MDPI journal article supplement (doi:10.3390/cancers15010035), 2022-12-21

A

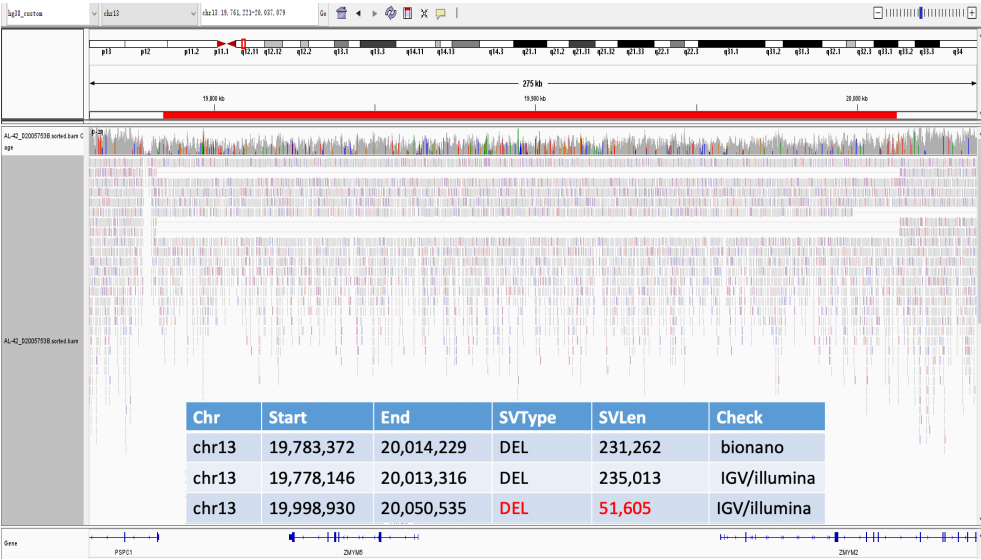

B

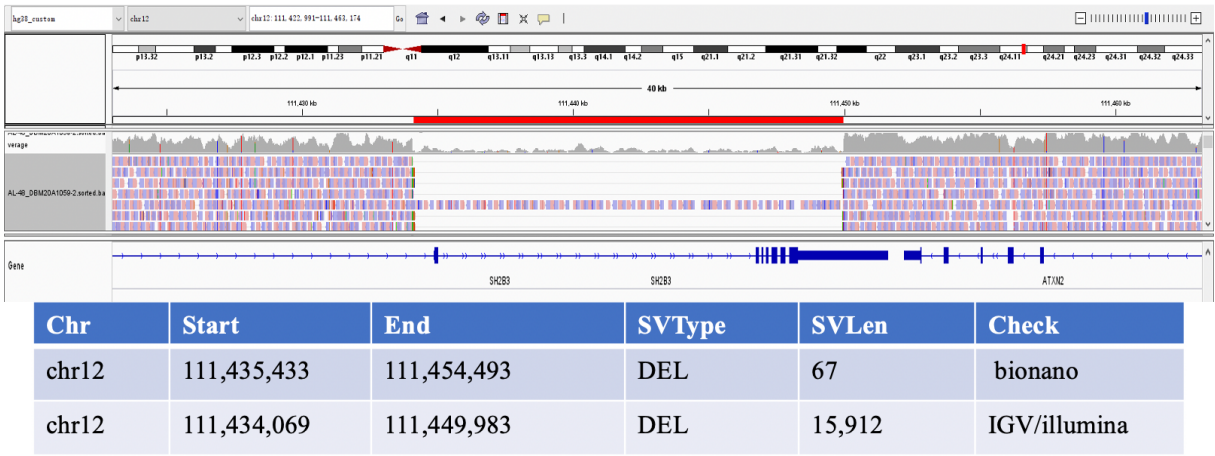

C

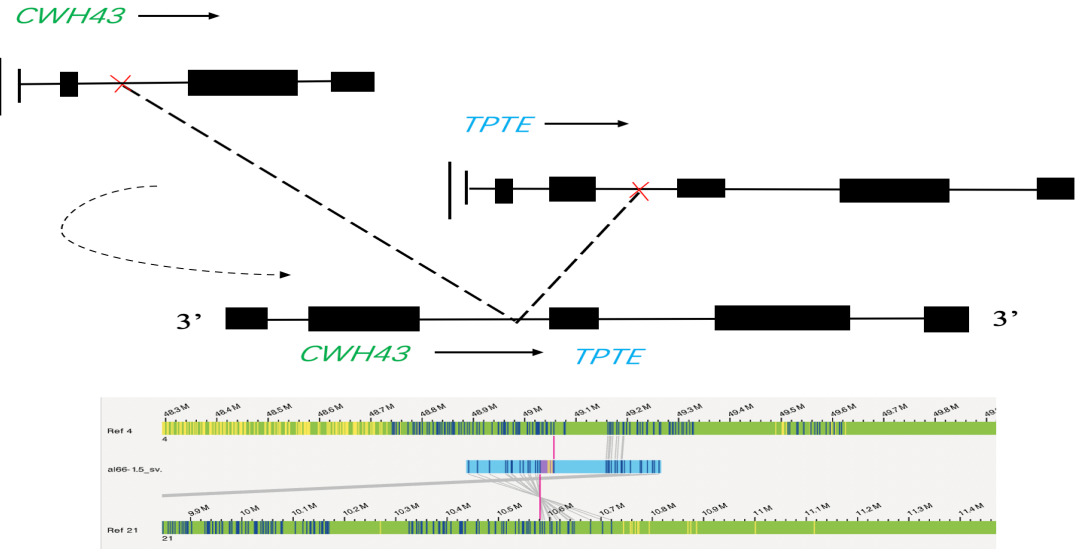

Supplement: s1 [file s1]
